# Supplementary material for: XPO5 promotes primary miRNA processing independently of RanGTP
Source: PubMed Central journal article supplement (PMC7160132; doi:10.1038/s41467-020-15598-x), 2020-04-15
Supplement: 41467_2020_15598_MOESM1_ESM.pdf [file 41467_2020_15598_MOESM1_ESM.pdf]

# **XPO5 promotes primary miRNA processing independently of RanGTP**

Wang *et al.*

# Supplementary Figure 1

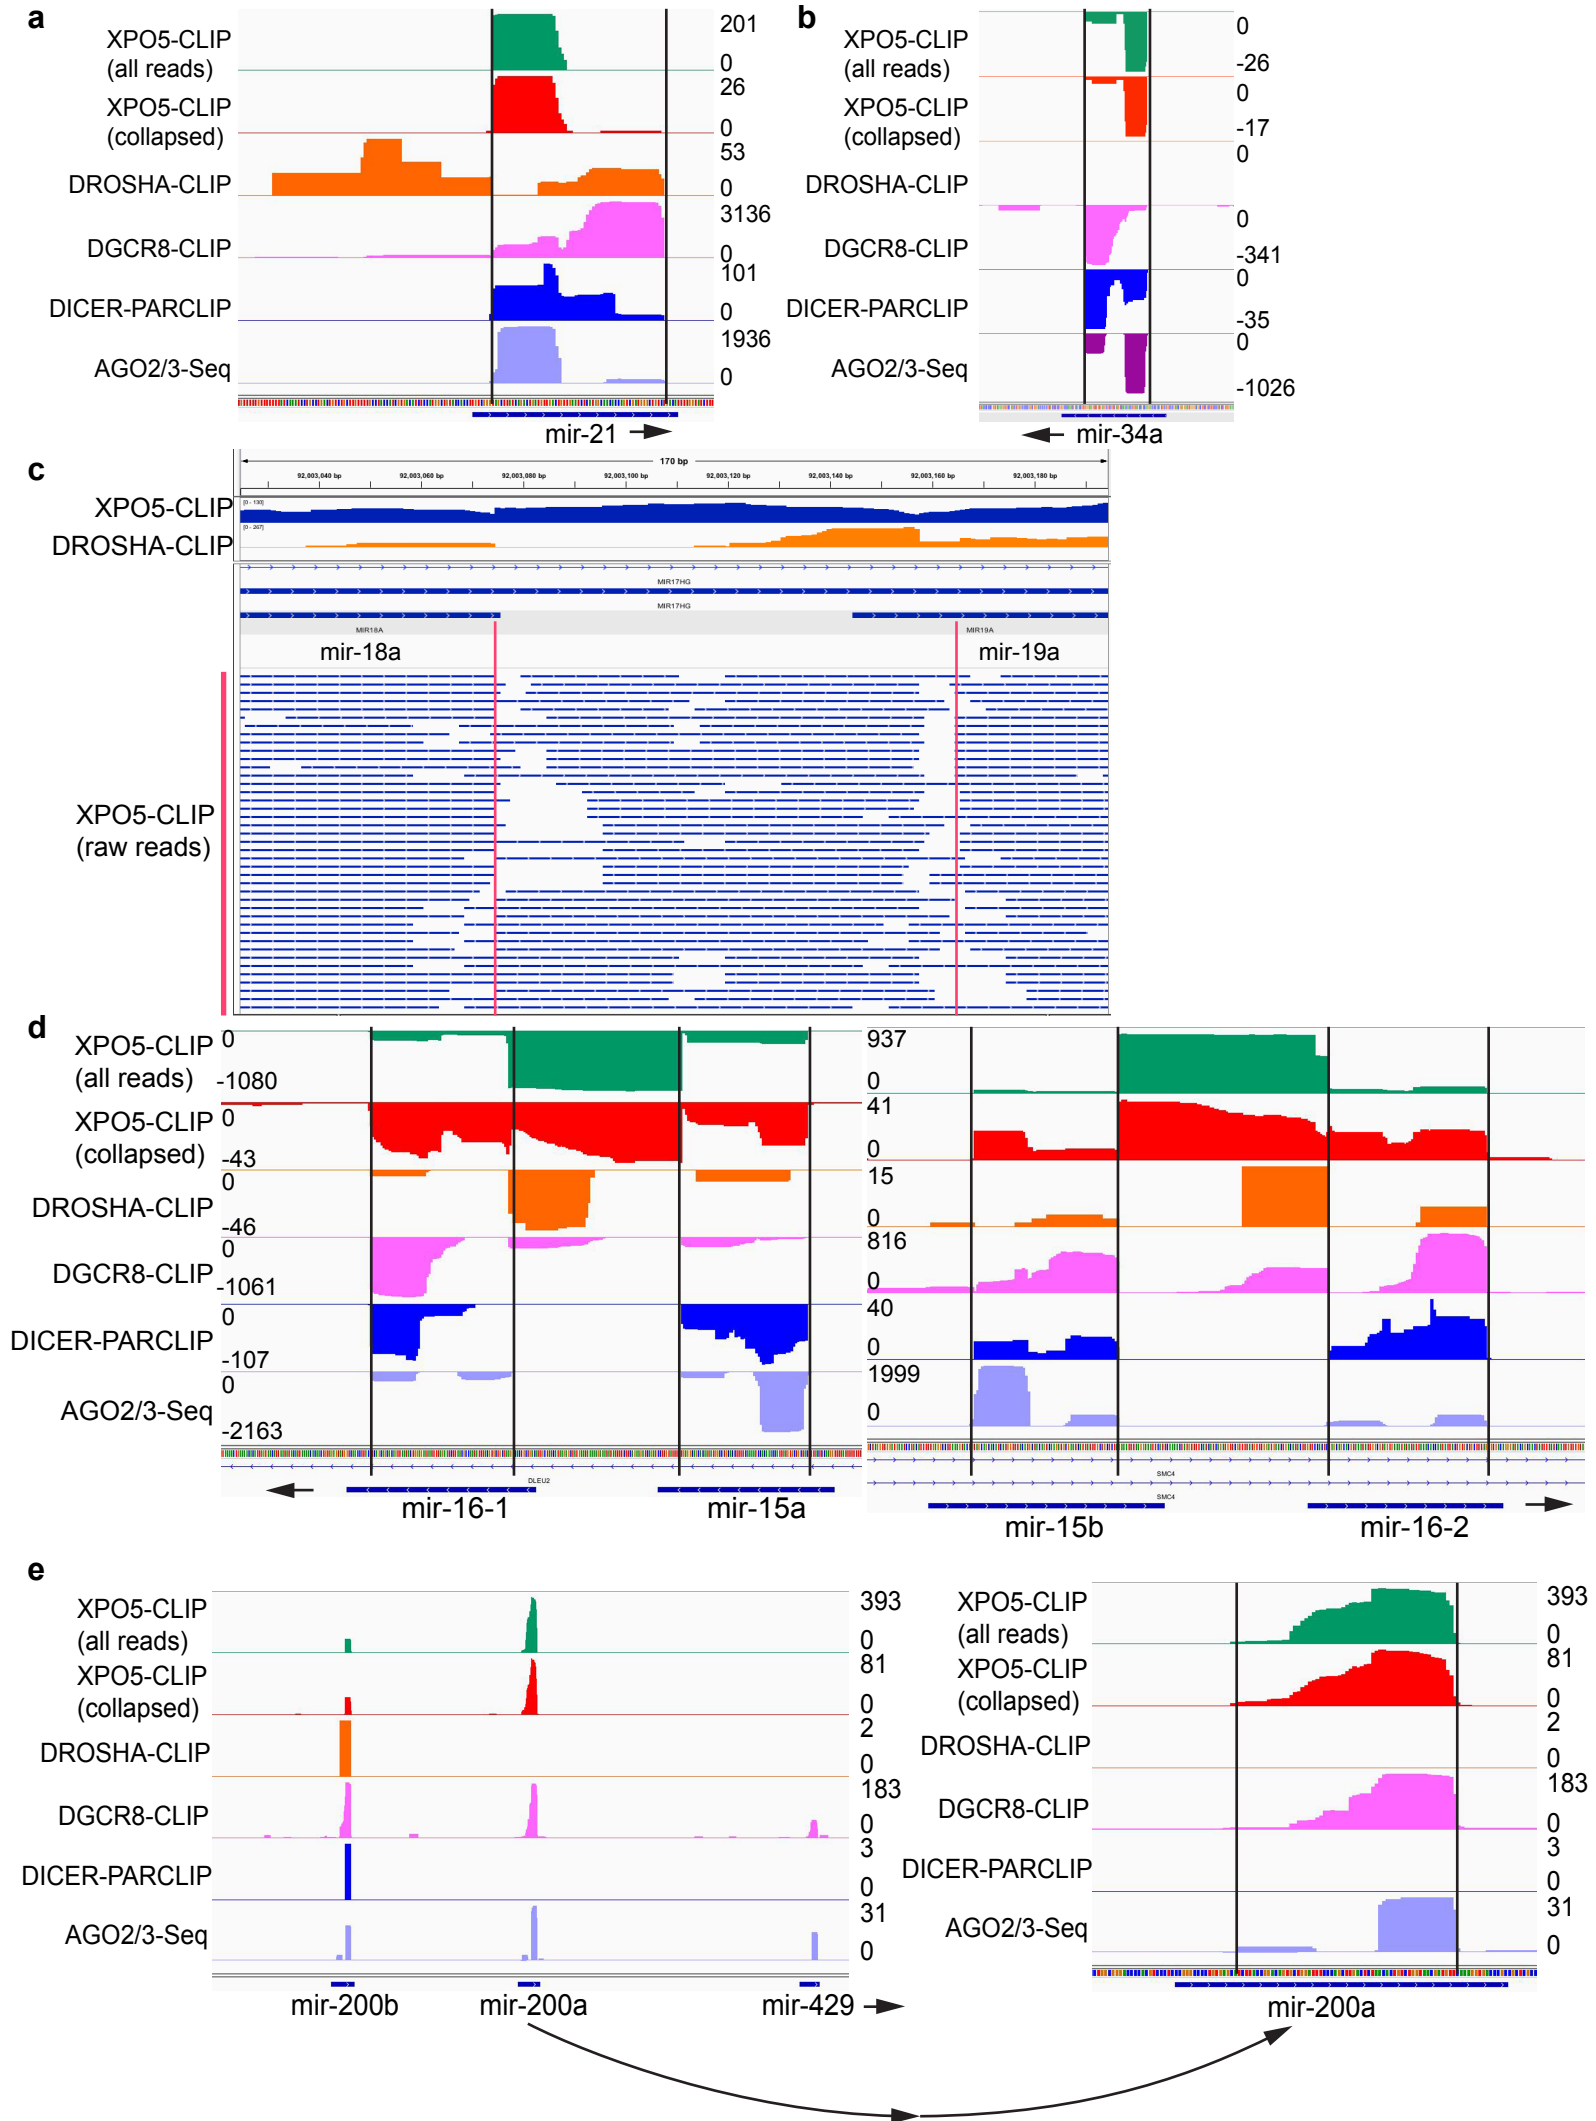

## Supplementary Figure 1. XPO5 associates with primary transcripts of closely clustered miRNAs.

(a-b) IGV tracks of XPO5-CLIP, DROSHA-CLIP, DGCR8-CLIP, DICER-PARCLIP and AGO2/3-Seq for *mir-21* (a) and *mir-34a* (b). XPO5 binding to these monocistronic miRNAs is restricted within the pre-miRNA hairpin.

(c) Individual reads of XPO5 HITS-CLIP data show that XPO5 recognizes uncleaved *pri-mir-17~92* fragments between *mir-18a* and *mir-19a*. Red lines indicate the boundary of pre-miRNA hairpin. Note that many reads are across the DROSHA cleaving sites.

(d-e) IGV tracks of XPO5-CLIP, DROSHA-CLIP, DGCR8-CLIP, DICER-PARCLIP and AGO2/3-Seq for *mir-15a~16-1* and *mir-15b~16-2* clusters (d), and *mir-200b* cluster (e). Widespread inter-pre-miRNA reads are only detected in *mir-15a~16-1* and *mir-15b~16-2* clusters but not in *mir-200b* cluster. Blue bars at the bottom and black lines together indicate the location of pre-miRNAs. Data range is shown on the left or right of each track. Negative value indicates the reads mapping to the minus strand.

## Supplementary Figure 2

a

Secondary structure of *pri-mir-17~92* by RNAfold

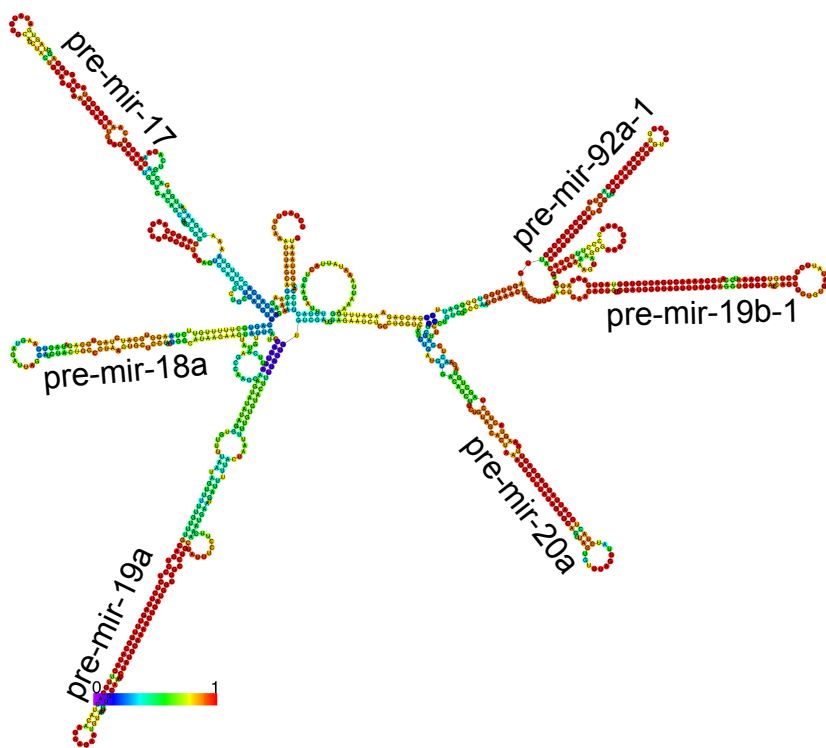

b

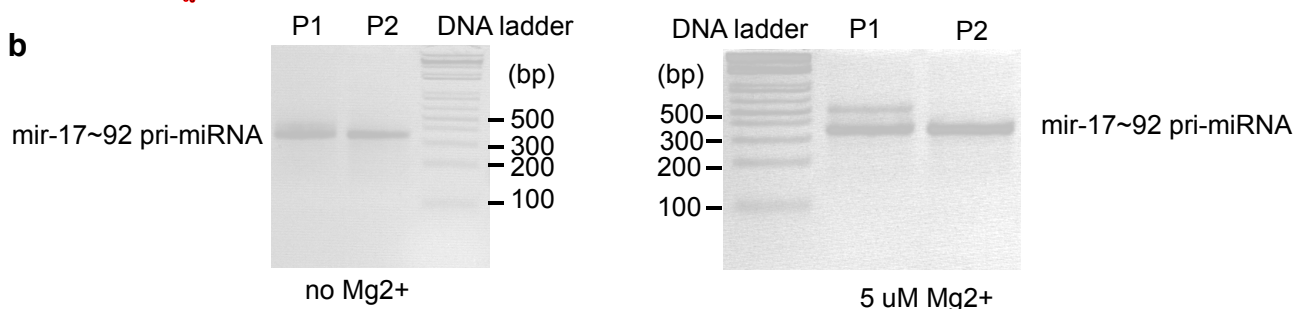

P1: 1. RNA was dissolved in TE; 2. Heat RNA at 95 °C for 2 min;  
3. Add RNA to refolding buffer; 4. Incubate at 37 °C for 20 min.

P2: 1. Dissolved RNA in refolding buffer; 2. Heat RNA at 60 °C for  
10 min and slow cool to temperature over 20 min.

c

Secondary structure of *pri-mir-19a* by RNAfold

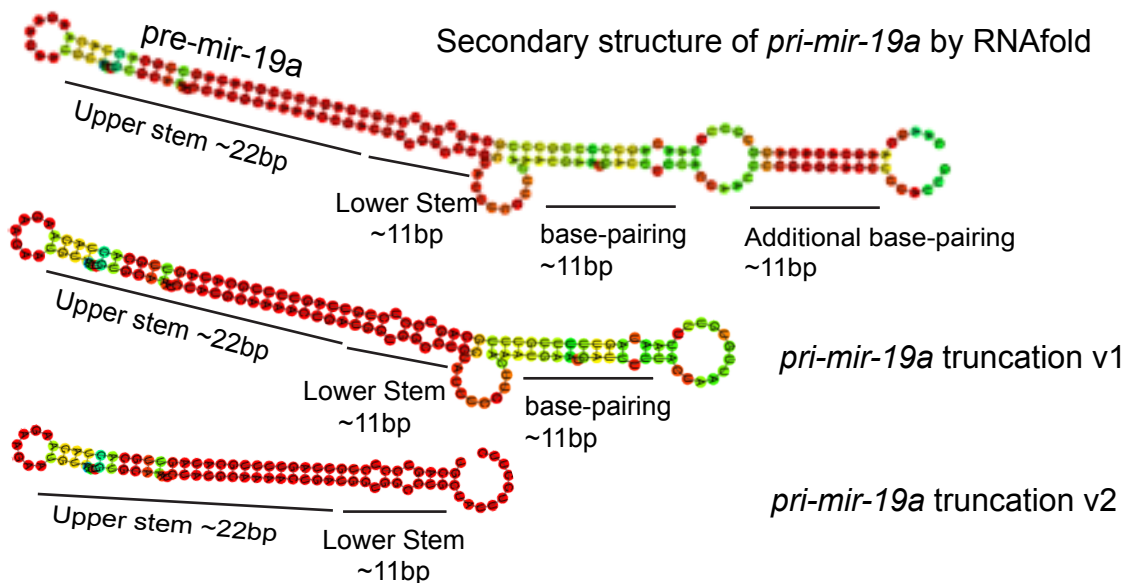

### Supplementary Figure 2. Predicted secondary structure and folding of *pri-mir-17~92* and *pri-mir-19a*.

(a) Secondary structure of *pri-mir-17~92* is predicted by RNAfold. Heat map indicates the probability of secondary structures (Purple: 0 - low; Red: 1 - high). (b) *Pri-mir17~92* is in vitro transcribed and folded under P1 and P2 conditions in refolding buffer with or without Mg<sup>2+</sup>. Note that a DNA ladder is used, which does not reflect the correct size of RNA. (c) Secondary structure of *pri-mir-19a* and its truncation versions are predicted by RNAfold. Heat map indicates the probability of secondary structures (Purple: 0 - low; Red: 1 - high). Original data for b are provided in the Source Data file.

### Supplementary Figure 3

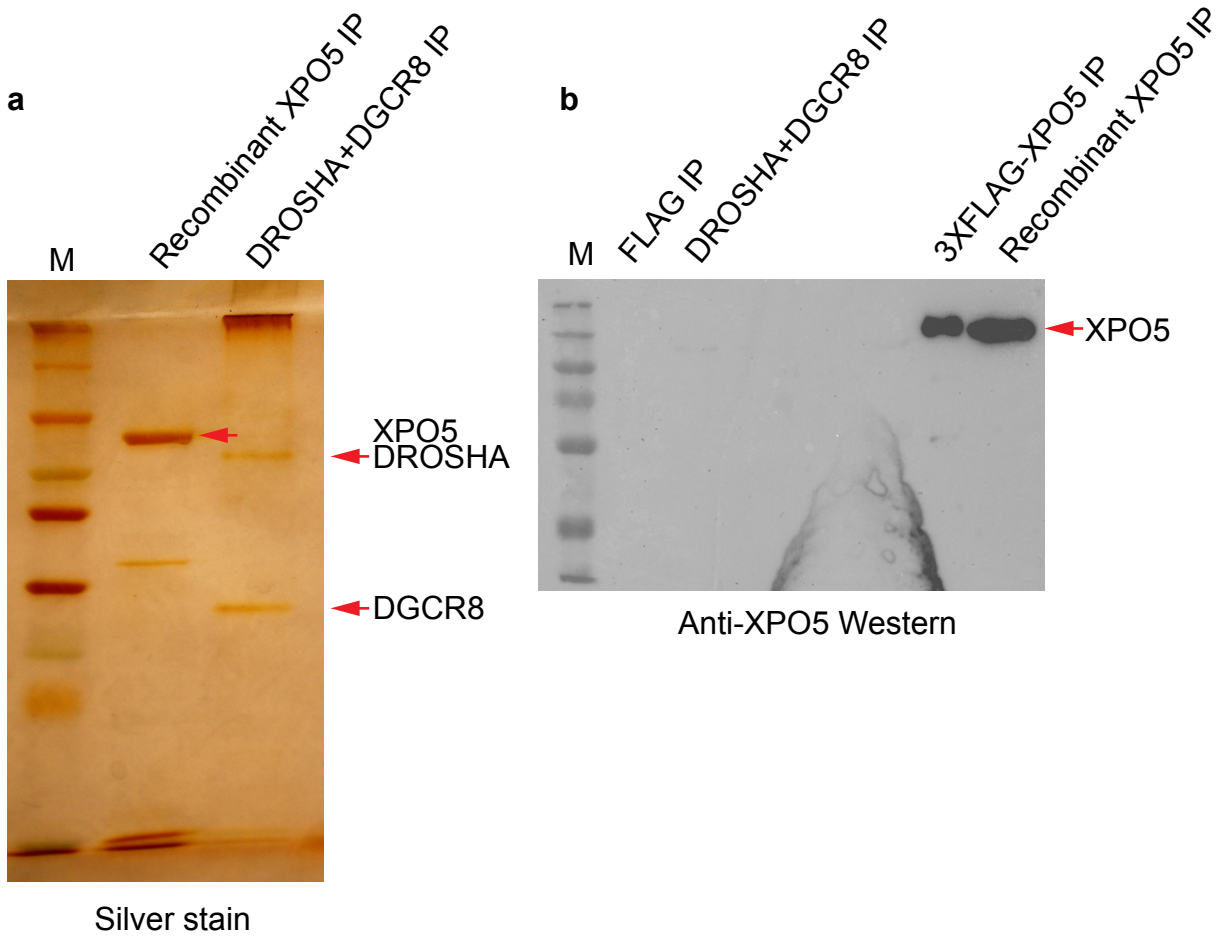

#### Supplementary Figure 3. XPO5 does not associate with the microprocessor.

(a) No XPO5 band is detected by silver staining for the 3XFLAG tagged microprocessor (DROSHA and DGCR8) immunoprecipitation sample from HEK293T cells. (b) Lack of XPO5 associating with the microprocessor is confirmed by XPO5 Western blotting for 3XFLAG tagged microprocessor immunoprecipitation sample. Both 3XFLAG-XPO5 and recombinant XPO5 are recognized by XPO5 antibody.

## Supplementary Figure 4

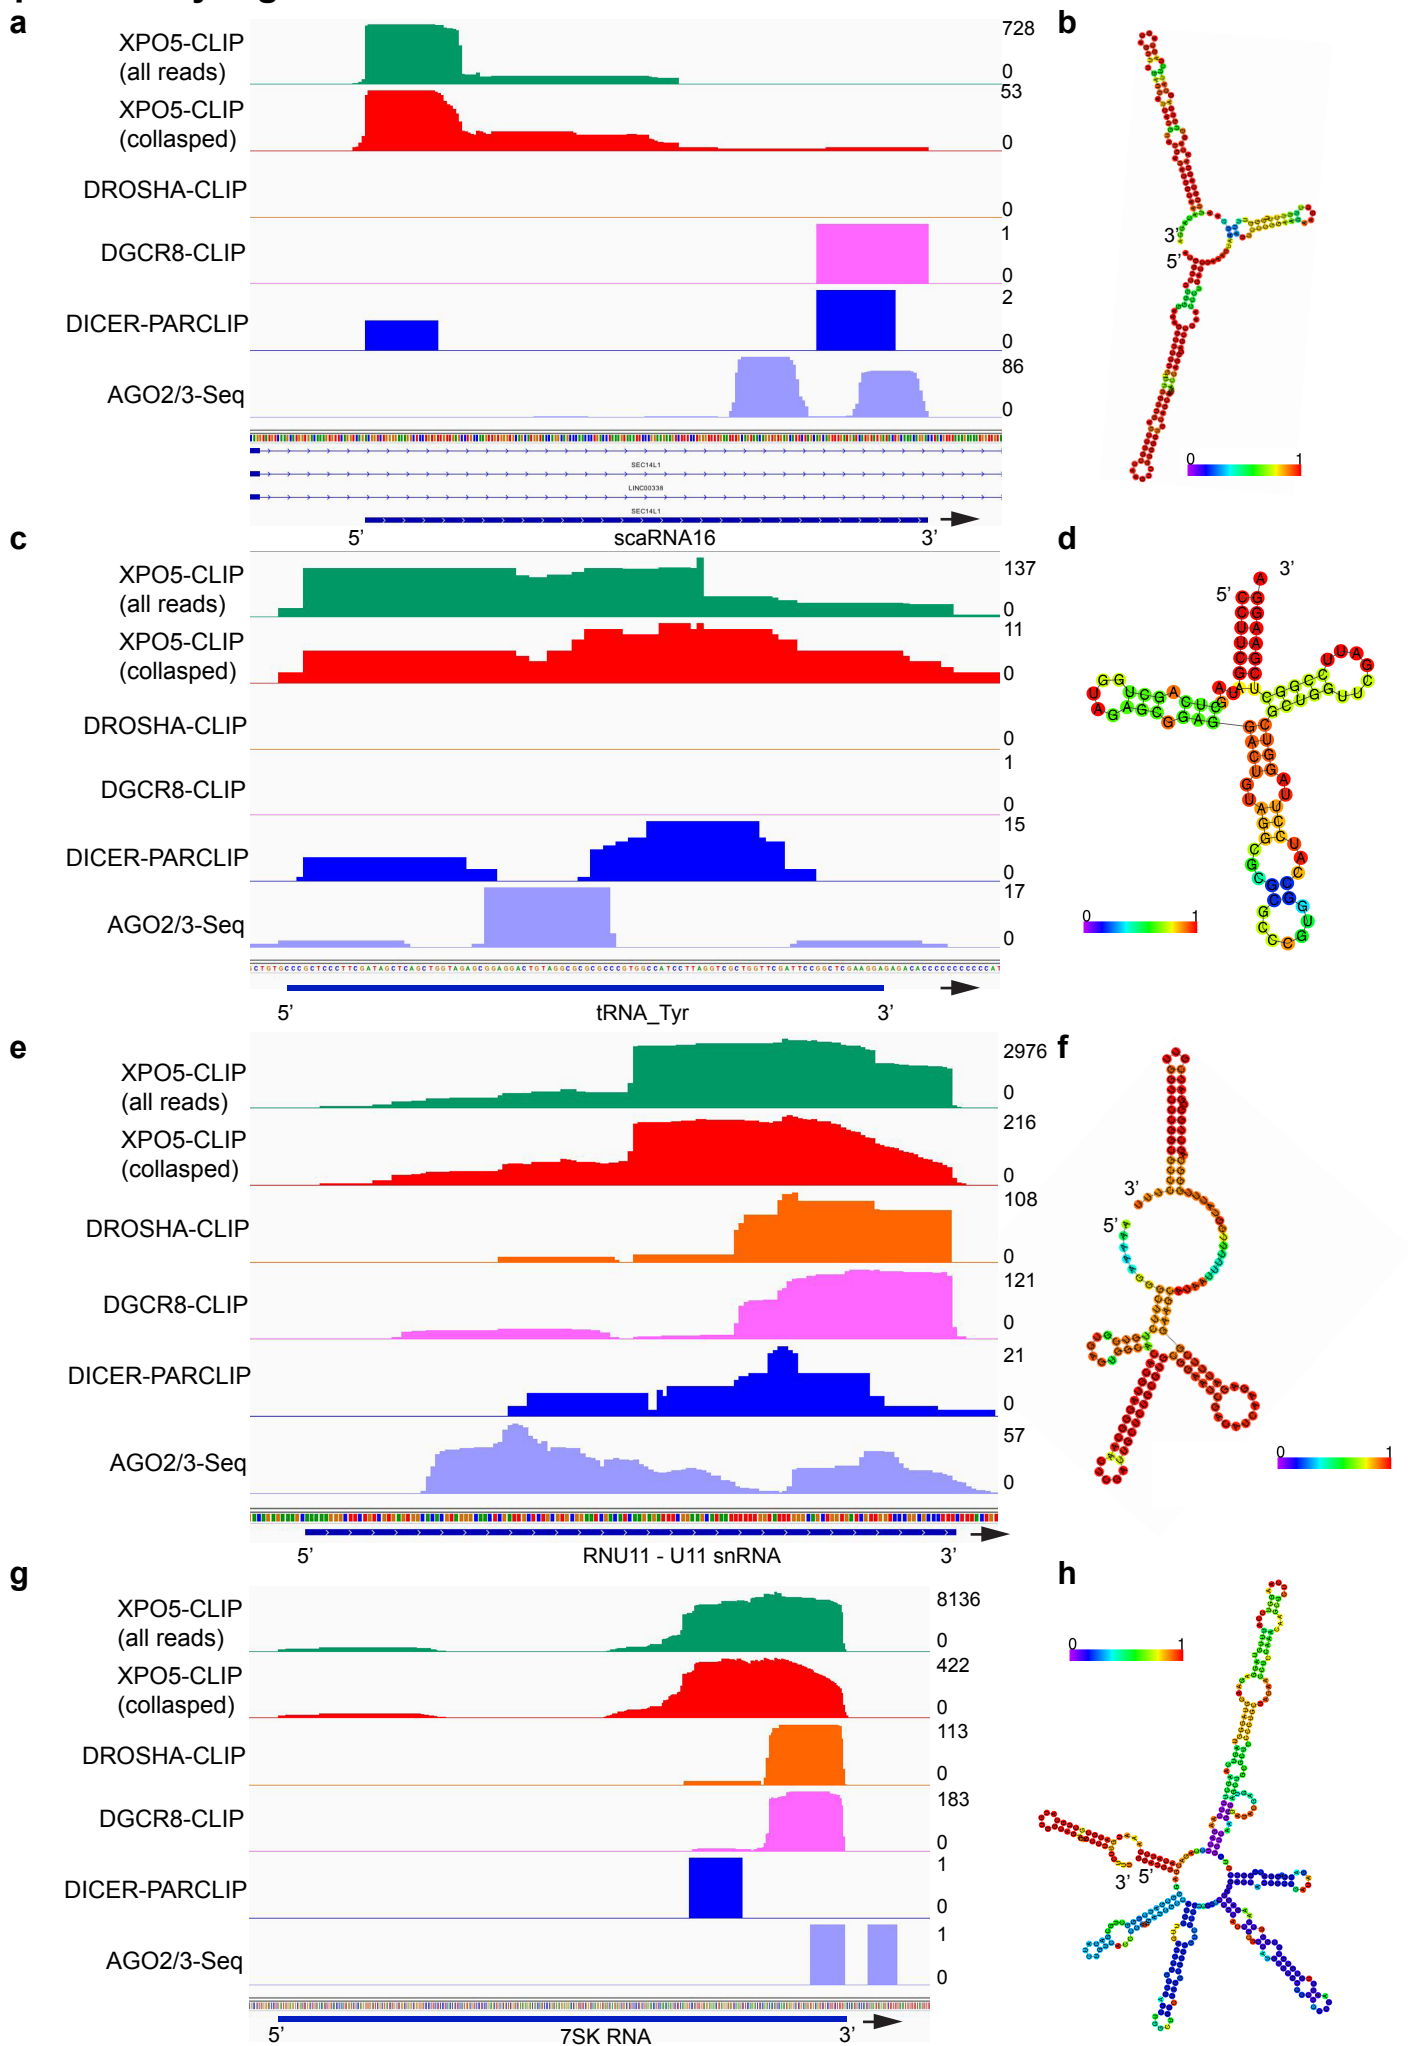

### Supplementary Figure 4. XPO5 associates with diverse cellular RNAs containing double-stranded regions.

(a, c, e, g) IGV tracks of XPO5-CLIP, DROSHA-CLIP, DGCR8-CLIP, DICER-PARCLIP and AGO2/3-Seq show the association of each component with scaRNA16 (a), tRNA-Tyr (c), U11 snRNA (e) and 7SK RNA (g). Blue bars at the bottom indicate the coding region of each RNA. Arrows indicate the direction of transcription. Data range is shown on the right of each track. (b, d, f and h) The predicted secondary structure of each RNA by *RNAfold*. Heat map indicates the probability of secondary structures (Purple: 0 - low; Red: 1 - high).

## Supplementary Figure 5

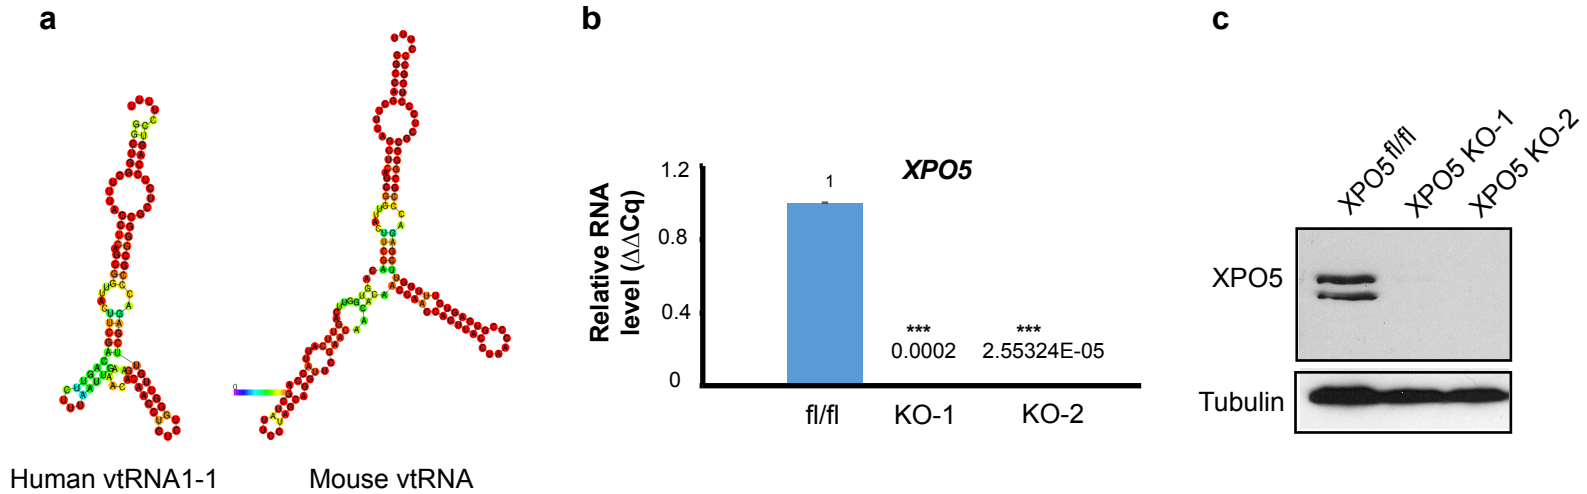

### Supplementary Figure 5. Predicted secondary structure of human vtRNA1-1 and mouse vault RNA and confirmation of XPO5 knock-out MEF cells.

(a) Secondary structures of human vtRNA1-1 and mouse vault RNA are predicted by *RNAfold*. Heat map indicates the probability of secondary structures (Purple: 0 - low; Red: 1 - high). (b-c) Depletion of XPO5 RNA and protein in XPO5 KO MEF cells are confirmed by qPCR and Western blot. Data shown are mean s.d. from 3 independent experiments. \*\*\* P < 0.001 by Student's t-test. Original data for c are provided in the Source Data file.

Supplementary Table 1 Antibodies and Primers

| <b>Antibodies</b>                                               | SOURCE                                                         | IDENTIFIER    |
|-----------------------------------------------------------------|----------------------------------------------------------------|---------------|
| Beta-4 antibody                                                 | BD Bioscience                                                  | Cat#553745    |
| Anti-Ki67 antibody                                              | Abcam                                                          | Cat#ab15580   |
| Polyclonal Antibody against Keratin 5, K5 (AF 138)              | Covance                                                        | Cat#PRB-160P  |
| Purified anti-Keratin 1 Antibody                                | Covance                                                        | Cat#PRB-165P  |
| LEF1 (C12A5) Rabbit mAb                                         | Cell signaling                                                 | Cat#2230      |
| Anti-Exportin-5 antibody [EPR8453]                              | Abcam                                                          | Cat#ab131281  |
| ANTI-FLAG® M2 Affinity Gel                                      | Sigma                                                          | Cat#A2220     |
| Anti-Mouse Ago2, Monoclonal Antibody                            | Wako Chemicals GmbH                                            | Cat#018-22021 |
| β-Tubulin Antibody                                              | Cell signaling                                                 | Cat#2146      |
| <b>Primers</b>                                                  |                                                                |               |
| Names                                                           | sequences                                                      |               |
| Human <i>XPO5</i> cloning forward primer                        | CCGCTCGAGGA ATGGCGATGGATC<br>AAGTAAACGC                        |               |
| Human <i>XPO5</i> cloning reverse primer                        | GGCTCTAGATC AGGGTTCAAAGAT GGTGGCC                              |               |
| miR17~92a pri-miRNA transcription forward primer                | GCGGTACCTAATACGACTCACTATAGGGTCAG<br>A ATAATGTCA AAGTGCTTACAG   |               |
| miR17~92a pri-miRNA transcription reverse primer                | GCAAGCTTCCAAACTCAACAGGCCGGGAC                                  |               |
| Pre-miR30a in vitro transcription forward primer                | TAATACGACTCACTATAGGTA ACATCCTCG<br>ACTGGAAGCTGT                |               |
| Pre-miR30a in vitro transcription reverse primer                | GCTGCA AACATCCGACTGAAAGC                                       |               |
| Pre-miR19a in vitro transcription forward primer                | TAATACGACTCACTATAGG<br>AGTTTTGCATAGTTGCACTACAAG                |               |
| Pre-miR19a in vitro transcription reverse primer                | TCAGTTTTGCATAGATTTGCACAAC                                      |               |
| Pri-miR19a in vitro transcription forward primer                | TAATACGACTCACTATAGGCAAGCAAGTATA<br>TAGGTGTTTTAATAG             |               |
| Pri-miR19a in vitro transcription reverse primer                | CAATAAAGTACACAAAATTAGTAAAAATCA                                 |               |
| Pri-mir-19a_truncation v1 in vitro transcription forward primer | TAATACGACTCACTATAGG TGT TTT AAT AGT<br>TTT TGT TTG CAG TCC TC  |               |
| Pri-mir-19a_truncation v1 in vitro transcription reverse primer | ATT AGT AAA AAT CAT TCA TTT GAA GGA AAT<br>AGC                 |               |
| Pri-mir-19a_truncation v2 in vitro transcription forward primer | TAATACGACTCACTATAGG T GCA GTC CTC<br>TGT TAG TTT TGC ATA GTT G |               |
| Pri-mir-19a_truncation v2 in vitro transcription reverse primer | GAA GGA AAT AGC AGG CCA CCA TC                                 |               |
| Pri-miR15b-16-2 in vitro transcription forward primer           | TAATACGACTCACTATAGGTTGAGGCCTTAA<br>AGTACTGTAGC                 |               |
| Pri-miR15b-16-2 in vitro transcription reverse primer           | TCC CTG TCA CAC TAA AGC AGC                                    |               |
| Pri-miR15b in vitro transcription reverse primer                | CAT AGT TTT GAA TGA ATT TCC TTA AAT                            |               |
| VtRNA1-1 in vitro transcription forward primer                  | TAATACGACTCACTATAGGGCTGGCTTTAG<br>CTCAGCGG                     |               |
| VtRNA1-1 in vitro transcription reverse primer                  | AAAAGGACTGGAGAGCGCCCG                                          |               |
| Mouse vtRNA probe for northern blot                             | GTA ACC GCT GAG CTA AAG CTG GCC                                |               |
| Mouse 5S RNA probe for northern blot                            | TCAGACGAGATCGGGCGCGTTTCAGGGTGGT                                |               |
| <b>qPCR primers</b>                                             |                                                                |               |
| <i>XPO5</i> _q_for primer                                       | TGATCCTGTTTGGAGATGTGC                                          |               |
| <i>XPO5</i> _q_rev primer                                       | CACATAGCAGATTTCCCAGTG                                          |               |
| <i>Oct4</i> _q_for primer                                       | AGTGGAAGCAACTCAGAGG                                            |               |
| <i>Oct4</i> _q_rev primer                                       | AACTGTTCTAGCTCCTTCTGC                                          |               |

|                                |                                      |                                                                                                                           |
|--------------------------------|--------------------------------------|---------------------------------------------------------------------------------------------------------------------------|
| <i>T</i> _q_for primer         | CCATTGCTCACAGACCAGAG                 |                                                                                                                           |
| <i>T</i> _q_rev primer         | GTCTAGCCTCGGAGTGCCT                  |                                                                                                                           |
| <i>Nanog</i> _q_for primer     | TCCAAGTTGGGTTGGTCCAAGTCT             |                                                                                                                           |
| <i>Nanog</i> _q_rev primer     | AACCAAAGGATGAAGTGCAAGCGG             |                                                                                                                           |
| <i>Tet</i> _q_for primer       | TTGCTCTTCTTCCCCATGAC                 |                                                                                                                           |
| <i>Tet</i> _q_rev primer       | CGAAAGAACAGCCACCAGAT                 |                                                                                                                           |
| <i>Krt5</i> _q_for_primer      | GAGTTT GTG ATG TTG AAG AAG GAT GTG G |                                                                                                                           |
| <i>Krt5</i> _q_rev_primer      | CCA TCA GGG CAT CGA CCC TG           |                                                                                                                           |
| <i>Krt1</i> _q_for_primer      | TCA GAT TCA AAA AGT GAA GTC TCA GGA  |                                                                                                                           |
| <i>Krt1</i> _q_rev_primer      | CGG GTT GTG GTG TCT ACC TGC T        |                                                                                                                           |
| <i>Lor</i> _q_for_primer       | AAG CAG CGG CGG CTC TAG              |                                                                                                                           |
| <i>Lor</i> _q_rev_primer       | CTA GAA CCG CCT CCG TAG CT           |                                                                                                                           |
| <i>Itgb4</i> _q_for_primer     | TTGGTCGCCGTCTGGTAAAC                 |                                                                                                                           |
| <i>Itgb4</i> _q_rev_primer     | GTGCCGGATGACAGGGATG                  |                                                                                                                           |
| <b>Recombinant DNA</b>         |                                      |                                                                                                                           |
| pCK-Drosha-FLAG plasmid        | (Lee et al., 2003)                   | N/A                                                                                                                       |
| pCK-FLAG-Dgcr8 plasmid         | (Lee et al., 2003)                   | N/A                                                                                                                       |
| pCDNA3-FLAG-XPO5 plasmid       | This paper                           | N/A                                                                                                                       |
| pCDNA3-FLAG-RanQ69L plasmid    | This paper                           | N/A                                                                                                                       |
| pQE60-XPO5 plasmid             | Addgene                              | Cat#12553                                                                                                                 |
| pQE32-RanQ69L plasmid          | Gift from Ian G. Macara              | N/A                                                                                                                       |
| pJMC101-T7-pri-miR17~92        | This paper                           | N/A                                                                                                                       |
| <b>Software and Algorithms</b> |                                      |                                                                                                                           |
| The mfold Web Server           | Michael Zuker & Nick Markham         | N/A                                                                                                                       |
| Cutadapt                       | (Martin, 2011)                       | <a href="https://cutadapt.readthedocs.io/en/stable/">https://cutadapt.readthedocs.io/en/stable/</a>                       |
| BedTools (v2.26.0)             | (Quinlan and Hall, 2010)             | <a href="http://bedtools.readthedocs.io/en/latest/">http://bedtools.readthedocs.io/en/latest/</a>                         |
| Bowtie2 (v.2.1.0)              | John Hopkins University              | <a href="http://bowtie-bio.sourceforge.net/bowtie2/index.shtml">http://bowtie-bio.sourceforge.net/bowtie2/index.shtml</a> |
| Htseq-count (v.0.6.0)          | (Anders et al., 2015)                | <a href="https://htseq.readthedocs.io/en/release_0.9.1/">https://htseq.readthedocs.io/en/release_0.9.1/</a>               |
| Novoalign                      | Novocraft                            | <a href="http://www.novocraft.com/products/novoalign/">http://www.novocraft.com/products/novoalign/</a>                   |
