# Supplementary material for: XPO5 promotes primary miRNA processing independently of RanGTP
Source: PubMed Central journal article supplement (PMC7160132; doi:10.1038/s41467-020-15598-x), 2020-04-15
Supplement: 41467_2020_15598_MOESM4_ESM.pdf [file 41467_2020_15598_MOESM4_ESM.pdf]

## **Description of Additional Supplementary Files**

File Name: Supplementary Data 1

Description: miRNA sequencing of HEK293T cells

File Name: Supplementary Data 2

Description: HITS-CLIP identifies XPO5 associated cellular RNAs in HEK293T cells

File Name: Supplementary Data 3

Description: smRNA-seq of XPO5 control and cKO epidermal cells
